# Supplementary material
Source: Springer Nature journal article supplement (https://www.springermedizin.de/resource/supplementary/12936_2008_620_MOESM9_ESM.pdf/9547840)
Supplement: MOESM9 [file 9547840]

# Logistic regression models for prediction of utilization of ITN by under-five children

| *Model X (Combined)              |      |            |          | +Model Y (Urban) |      |           |          |
|----------------------------------|------|------------|----------|------------------|------|-----------|----------|
| (n=2009)                         |      |            |          | (n=743)          |      |           |          |
| Variables                        | **OR | 95% CI**   | #P-value | Variables        | ##OR | 95% CI    | #P-value |
| <i>Health facility</i>           |      |            |          | <i>Region</i>    |      |           |          |
| Absent                           | 1.00 |            |          | South            | 1.00 |           |          |
| Present                          | 2.95 | 1.29-6.78  | 0.03     | North            | 0.18 | 0.06-0.54 | 0.002    |
| <i>Religion</i>                  |      |            |          |                  |      |           |          |
| Islam                            | 1.00 |            | 0.048    |                  |      |           |          |
| Christianity                     | 3.30 | 1.28-8.53  | 0.014    |                  |      |           |          |
| Other                            | 0.00 | 0.00       | 0.999    |                  |      |           |          |
| <i>CWI*Caregiver's education</i> |      |            |          |                  |      |           |          |
| CWI*None                         | 1.00 |            |          |                  |      |           |          |
| CWI*Educated                     | 1.43 | 1.04 -1.98 | 0.03     |                  |      |           |          |

\*Model X: for combined data; \*\*OR, odds ratio adjusted for child's age, family size, region (dichotomised), region by residence, residence, fever/convulsion episode, and combined wealth index (as a continuous variable); Hosmer & Lemeshow test for goodness-of-fit =0.09.

+Model Y: for urban residence, ##OR, adjusted for child's age, family size, region by residence, residence, fever/convulsion episode, and combined wealth index (as a continuous variable), health facility status, religion and combined wealth index by caregiver's education.

*CWI\*Caregiver's education*: interaction term for combined wealth index and caregiver's education.
